# Supplementary material for: A Novel Route to High-Quality Graphene Quantum Dots by Hydrogen-Assisted Pyrolysis of Silicon Carbide
Source: MDPI journal article supplement (doi:10.3390/nano10020277), 2020-02-06
Supplement: s1 [file s1]

## **Supplementary Information**

# **A Novel Route to High-Quality Graphene Quantum Dots by Hydrogen-Assisted Pyrolysis of Silicon Carbide**

*Na Eun Lee<sup>1</sup>, Sang Yoon Lee<sup>1</sup>, Hyung San Lim<sup>1</sup>, Sung Ho Yoo<sup>1</sup>, Sung Oh Cho<sup>1,\*</sup>*

<sup>a</sup> Department of Nuclear and Quantum Engineering, Korea Advanced Institute of Science and Technology (KAIST), Daejeon 34141, Republic of Korea

\* Correspondence: socho@kaist.ac.kr; Tel.: +82-(0)42-350-3823 Fax: +82-(0)42-350-3810

**KEYWORDS:** graphene quantum dots; silicon carbide; hydrogen-assisted pyrolysis; high-quality

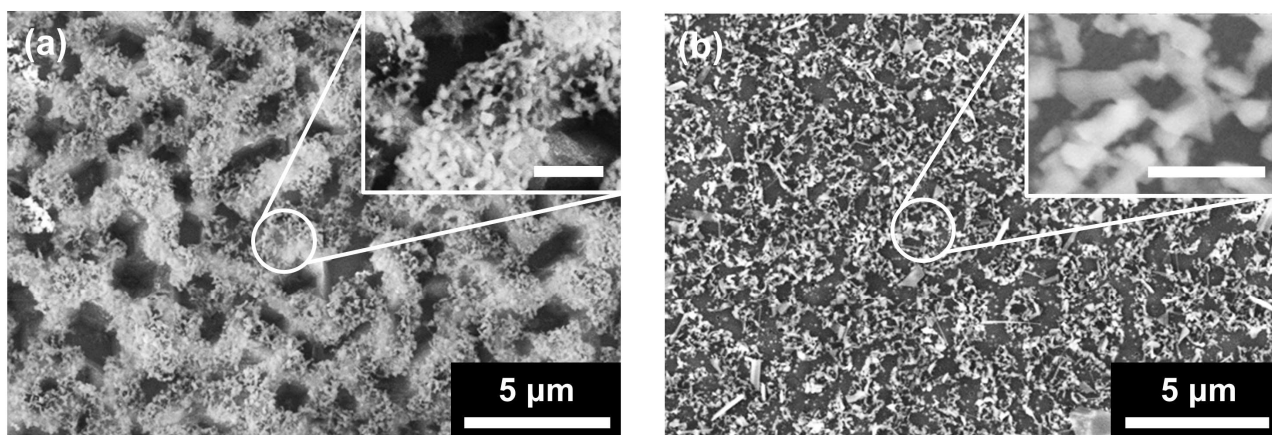

**Figure S1.** FE-SEM image of GQDs on SiC plate after annealed at 1500 °C with various operating hydrogen etching gas pressure. The operating pressure was (a) 120 mTorr (inset scale bar is 1  $\mu\text{m}$ ) and (b) 160 mTorr (inset scale bar is 1  $\mu\text{m}$ ).

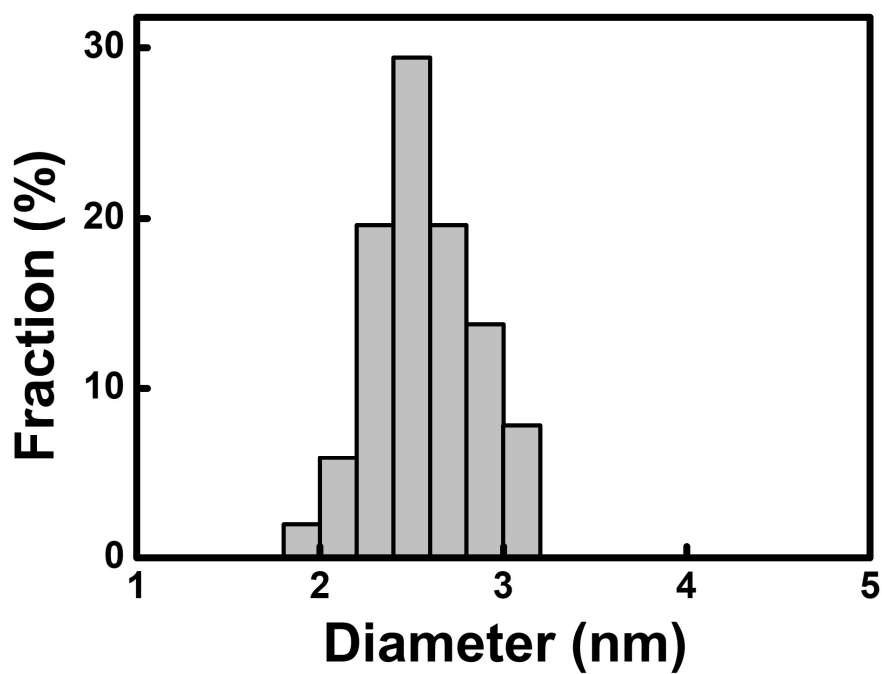

**Figure S2.** Size distribution of fabricated GQDs.

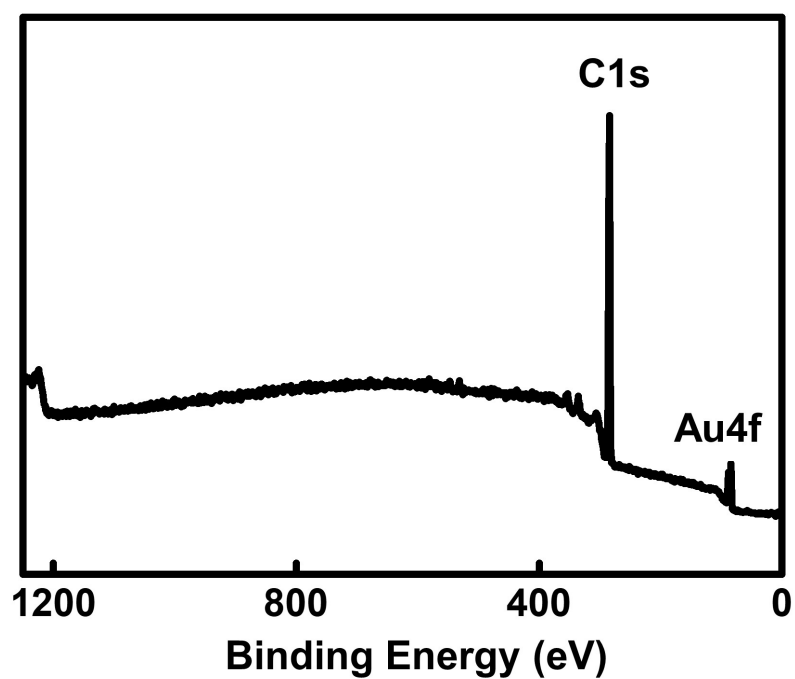

**Figure S3.** X-ray photoelectron spectroscopy (XPS) survey spectrum of the fabricated high-quality GQDs.
